# Supplementary material for: Genome rearrangements and pervasive meiotic drive cause hybrid infertility in fission yeast
Source: eLife journal article supplement (doi:10.7554/elife.02630), 2014-06-24
Supplement: figures [file elife-02630-figures-v1.pdf]

---

## Figures and figure supplements

Genome rearrangements and pervasive meiotic drive cause hybrid infertility in fission yeast

**Sarah E Zanders, et al.**

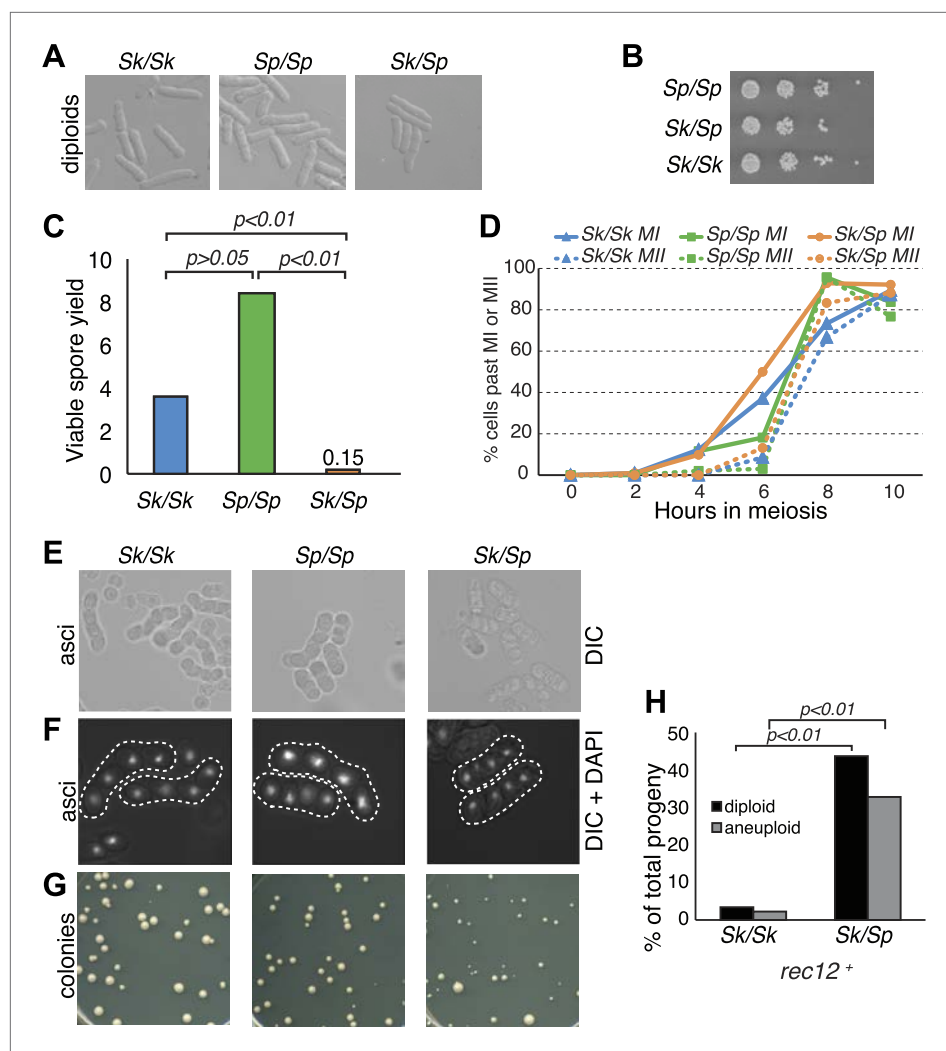

**Figure 1.** *Sk/Sp* hybrids are healthy but exhibit low fertility. (A) *Sk/Sp* hybrid diploids are morphologically similar to pure species diploids. (B) *Sk/Sp* hybrid diploids show no gross growth defects relative to pure species controls. (C) Viable spore yield tests show that *Sk/Sp* fertility is low relative to pure species controls (averages of  $n \geq 5$  experiments, p-values obtained using t test). This assay does not directly measure viable spores per meiosis, so values can exceed 4. (D) *Sk/Sp* hybrids complete both meiotic divisions with timing similar to that of pure species controls (representative experiment of 3,  $n \geq 200$  cells for each data point). (E and F) The asci produced by *Sk/Sp* hybrids contain spores that are more irregular and transparent than pure species asci. (G) The viable spores produced by *Sk/Sp* hybrids often grow into small irregularly sized and shaped colonies. (H) The majority of the viable spores produced by *Sk/Sp* hybrids are aneuploid or diploid (p-values obtained using G-test,  $n > 200$  for each). These data are also shown in **Figure 5A**.

DOI: [10.7554/eLife.02630.003](https://doi.org/10.7554/eLife.02630.003)

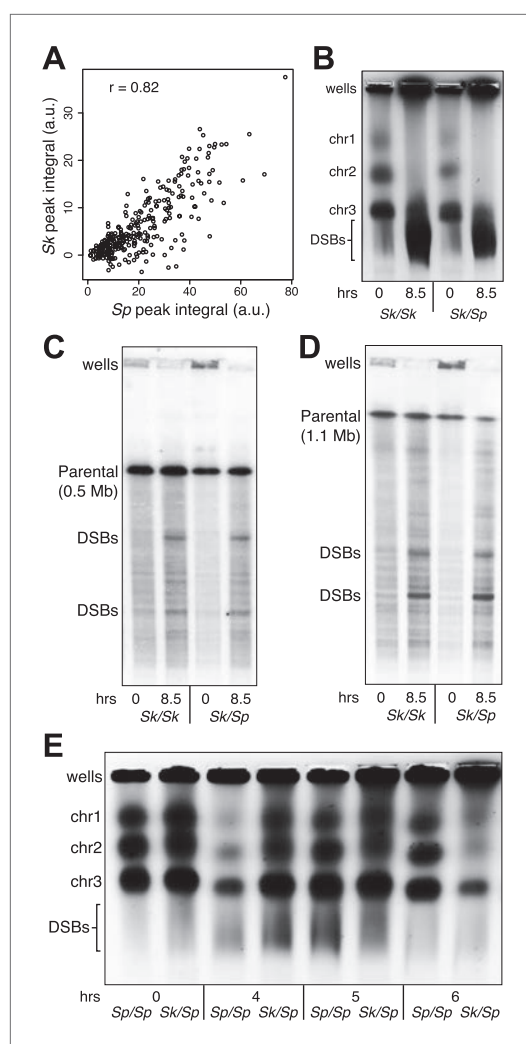

**Figure 2.** DSB hotspot divergence and repair in *Sk/Sp* hybrids. **(A)** We used ChIP–chip of Rec12-FLAG from *rad50S* *Sk* meiotic cultures to assay DSB hotspots and compared the profile to the published DSB hotspot maps of *Sp* (Fowler et al., 2013). We then compared the Rec12-enrichment in *Sk* at 286 defined *Sp* hotspots and found a strong correlation between Rec12 enrichments between the two species at these sites. **(B)** *Sk/Sp* cells are proficient at inducing DSBs. Ethidium bromide stained pulsed-field gel of diploids at 0 and 8.5 hr after inducing meiosis in liquid cultures. These diploids are *rad50S* mutants, so DSBs form normally but are not repaired. As DSBs are formed, the three full-sized chromosome bands disappear and the DNA runs as smaller broken fragments on the gel. **(C and D)** We find that DSBs are formed at similar locations and similar frequencies in *Sk/Sp* and *Sk/Sk*. Southern blots of pulsed-field gels to obtain a closer view of DSB formation in *rad50S* diploids probed to visualize two *NotI* restriction fragments known as *NotI* J [shown in (C)] and *NotI* D [shown in (D)]. Prior to DSB formation, most of the DNA runs as a single large band. After all break formation (8.5 hr) smaller cut fragments become apparent at the same Figure 2. Continued on next page

Figure 2. Continued

sites in *Sk/Sp* and *Sk/Sk*. (E) DSBs are efficiently repaired in *Sk/Sp*. Ethidium bromide stained pulsed-field gel of *rad50<sup>+</sup>* diploids at the given times after the induction of meiosis show that DSBs do not accumulate more in *Sk/Sp* than the *Sp/Sp* control during meiotic prophase. Together with those in (B) these data demonstrate that *Sk/Sp* cells form and efficiently repair DSBs.

DOI: [10.7554/eLife.02630.004](https://doi.org/10.7554/eLife.02630.004)

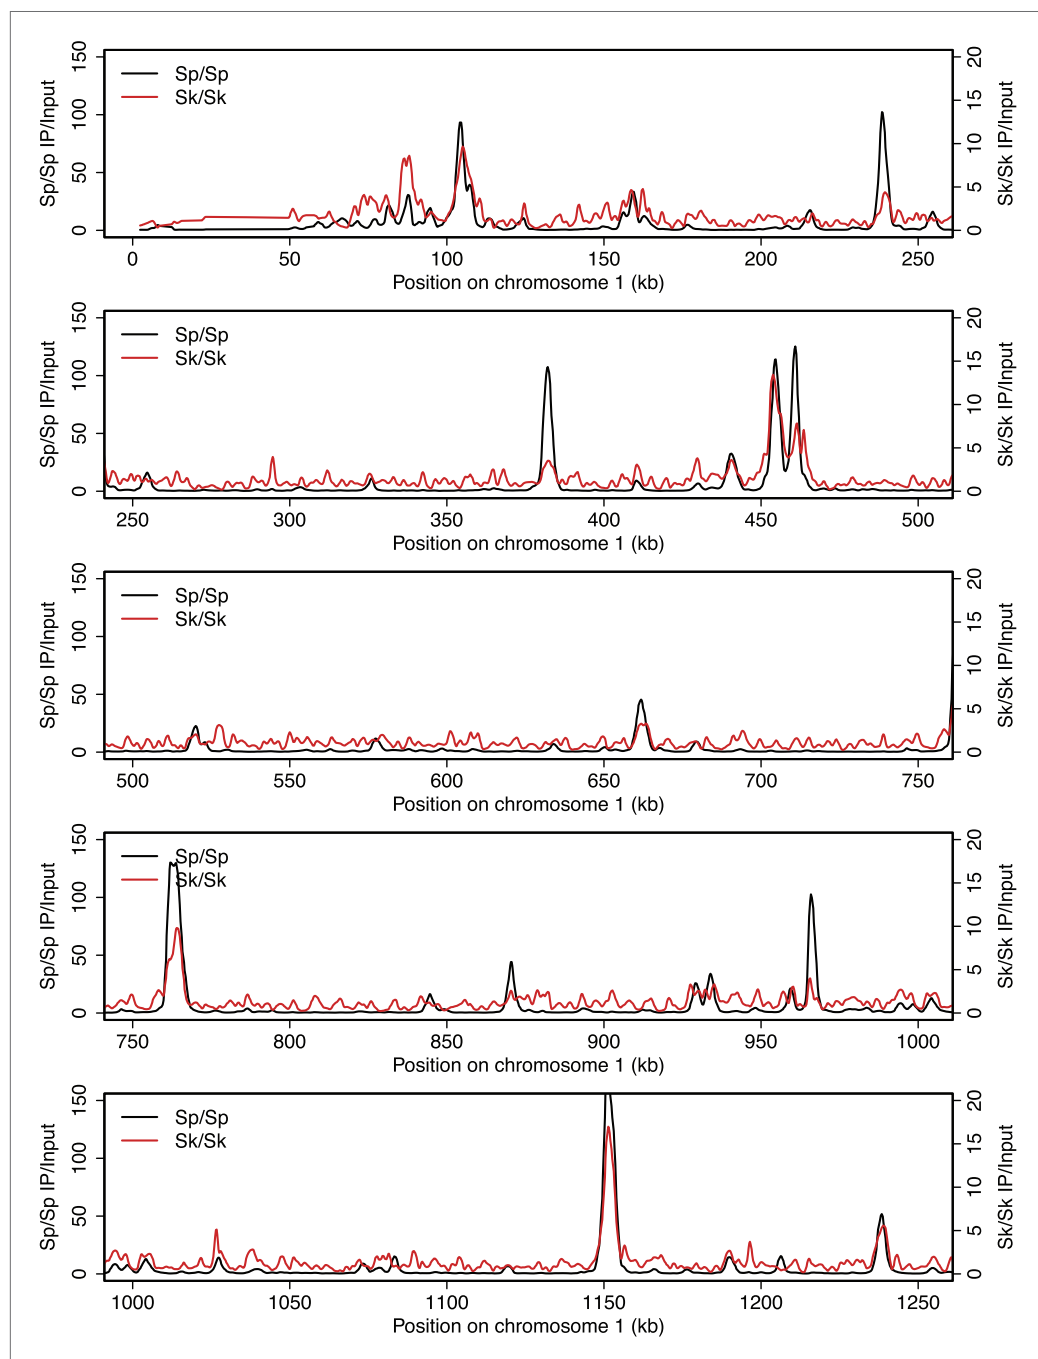

**Figure 2—figure supplement 1.** DSB hotspots in *Sk* and *Sp*.

DOI: [10.7554/eLife.02630.005](https://doi.org/10.7554/eLife.02630.005)

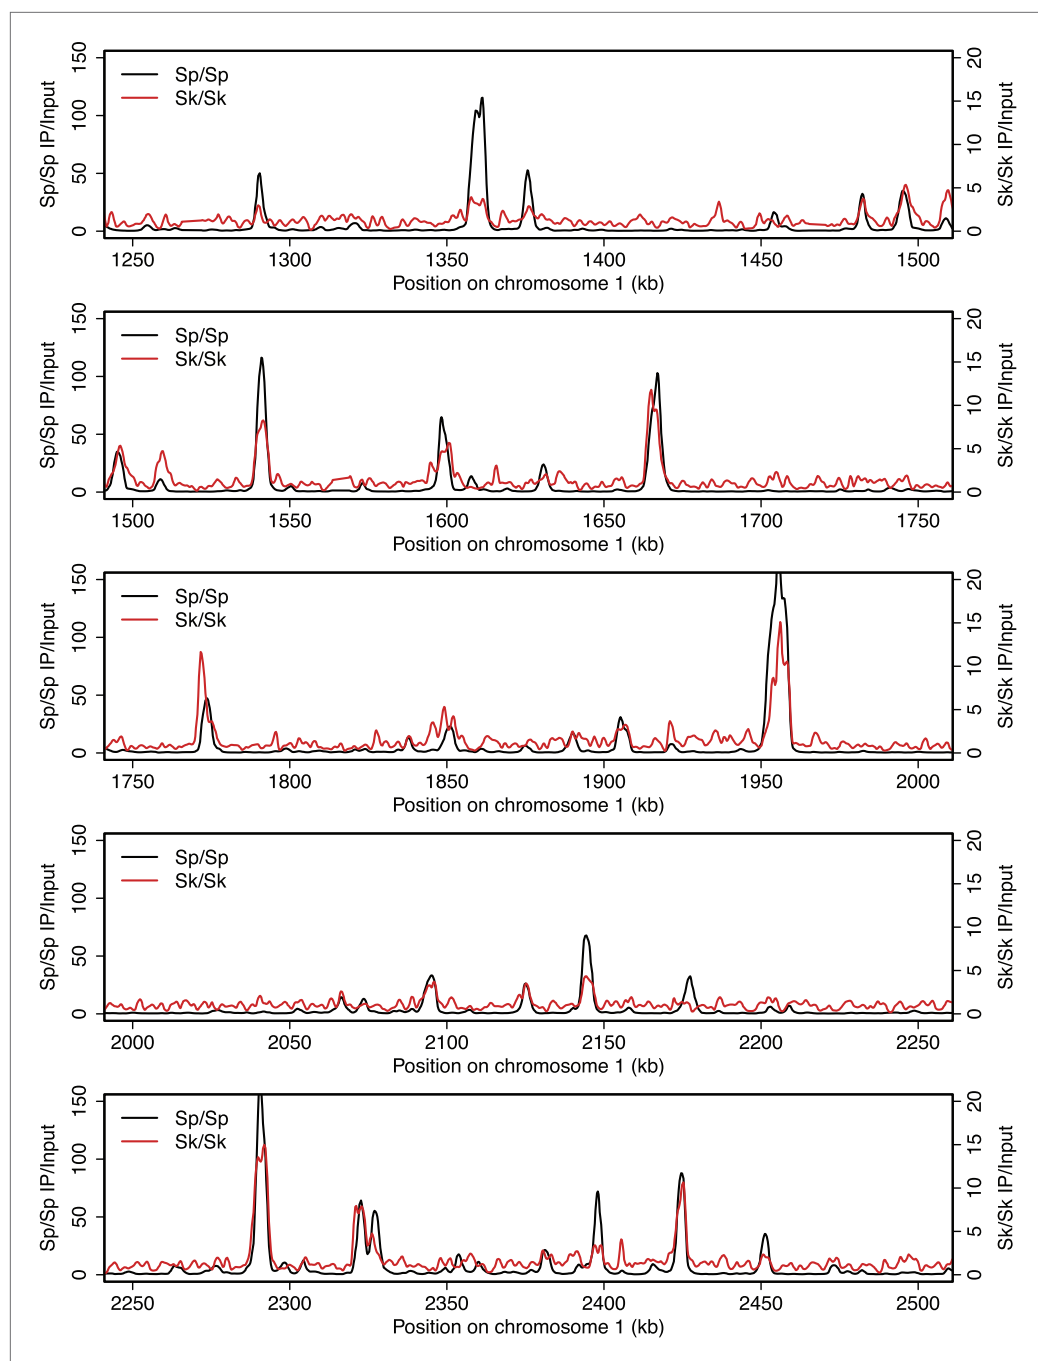

**Figure 2—figure supplement 2.** DSB hotspots in *Sk* and *Sp*.

DOI: [10.7554/eLife.02630.006](https://doi.org/10.7554/eLife.02630.006)

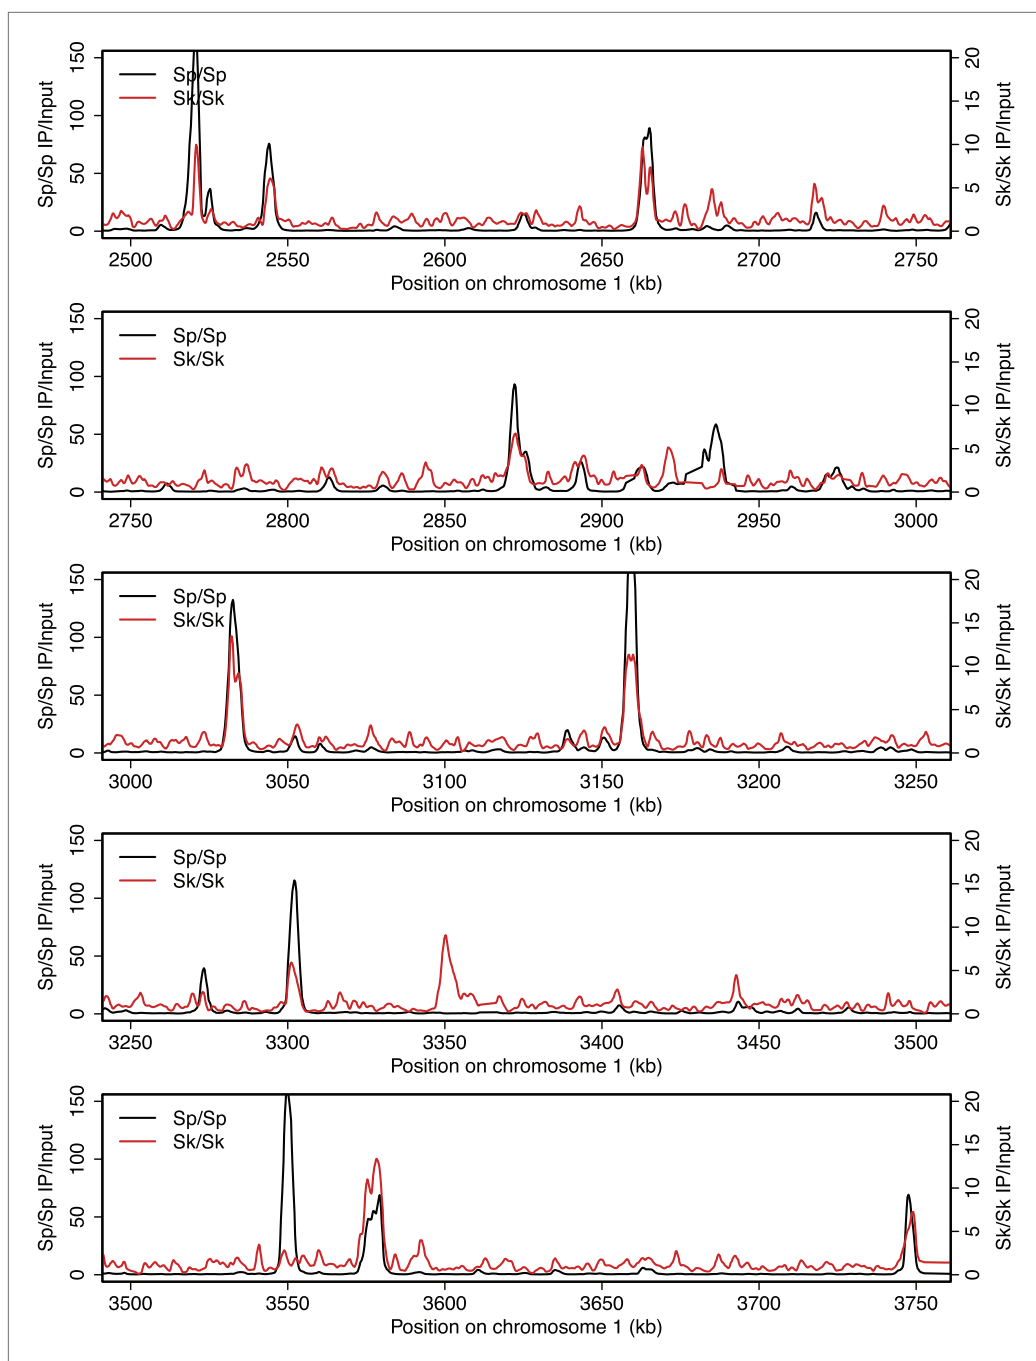

**Figure 2—figure supplement 3.** DSB hotspots in *Sk* and *Sp*.

DOI: [10.7554/eLife.02630.007](https://doi.org/10.7554/eLife.02630.007)

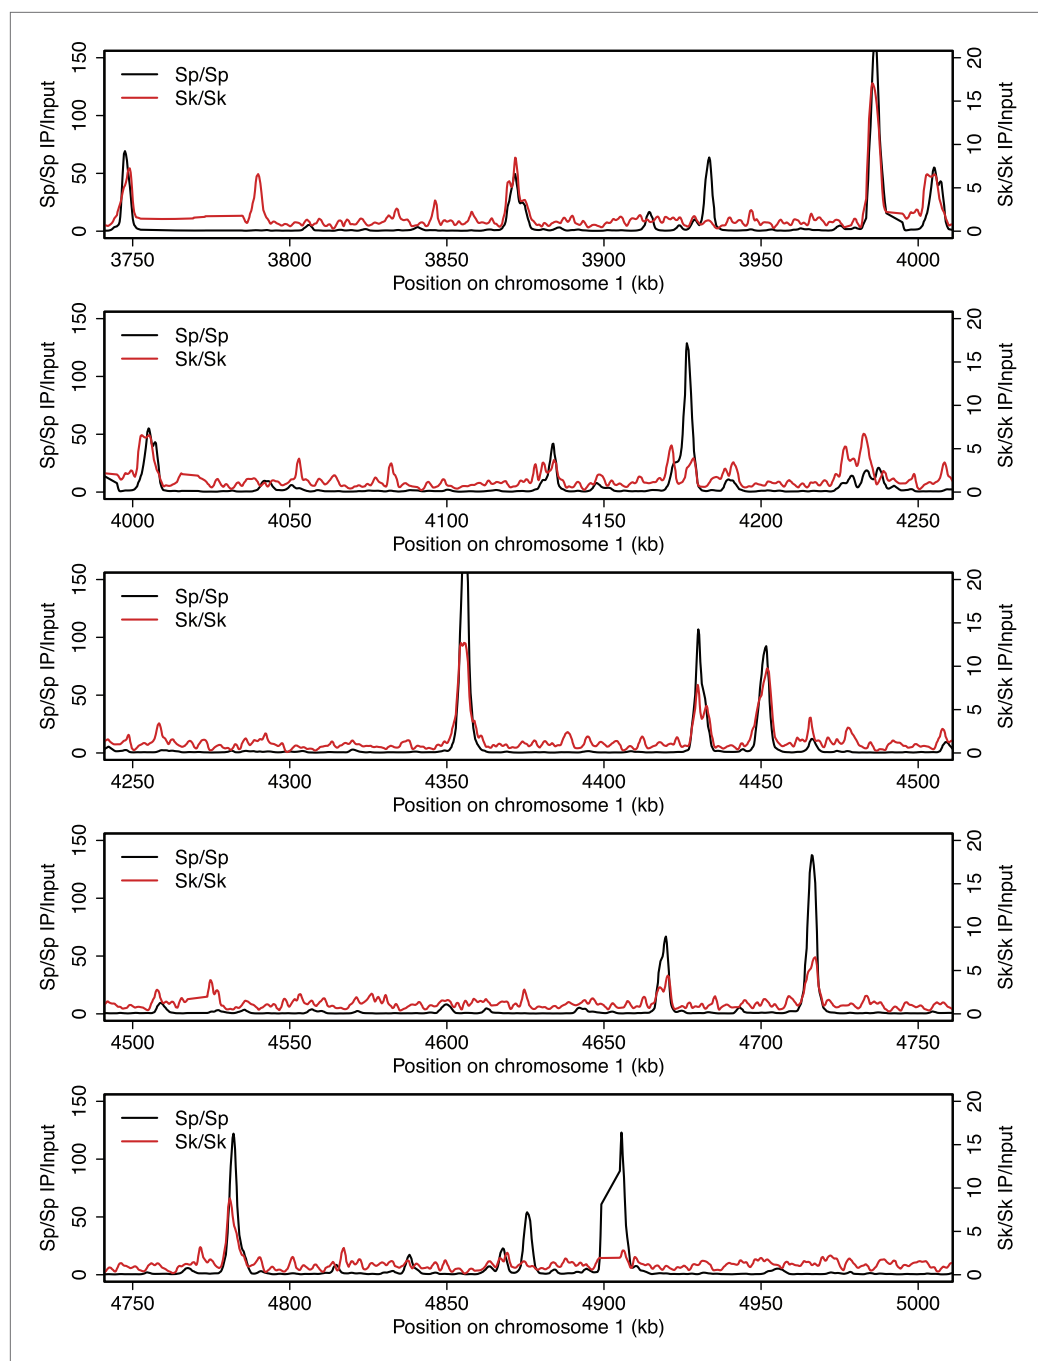

**Figure 2—figure supplement 4.** DSB hotspots in *Sk* and *Sp*.

DOI: [10.7554/eLife.02630.008](https://doi.org/10.7554/eLife.02630.008)

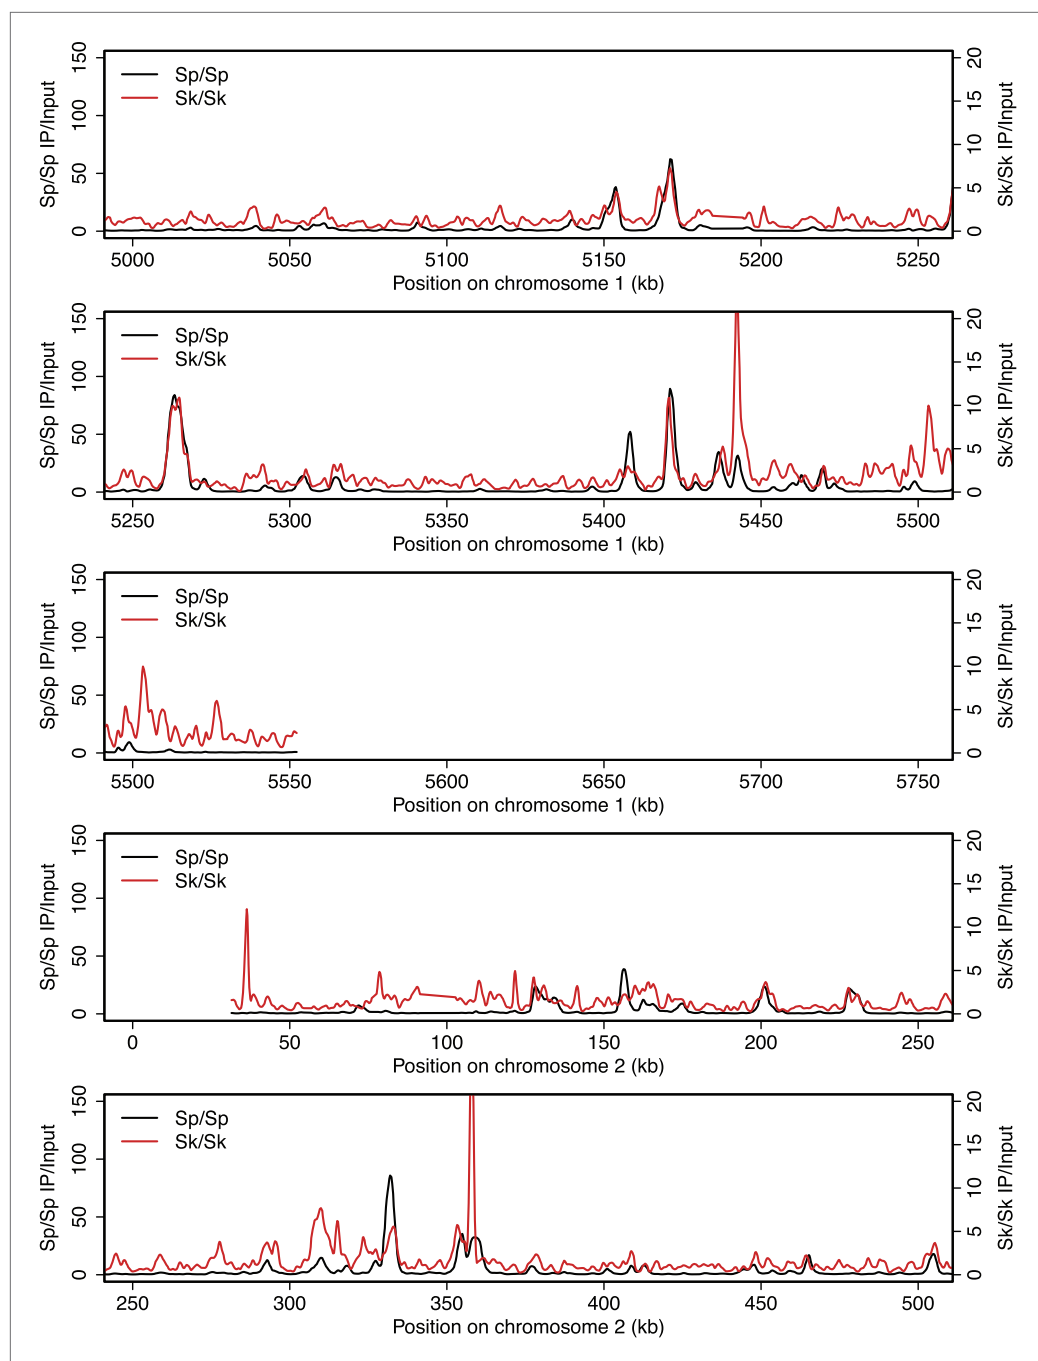

**Figure 2—figure supplement 5.** DSB hotspots in *Sk* and *Sp*.

DOI: [10.7554/eLife.02630.009](https://doi.org/10.7554/eLife.02630.009)



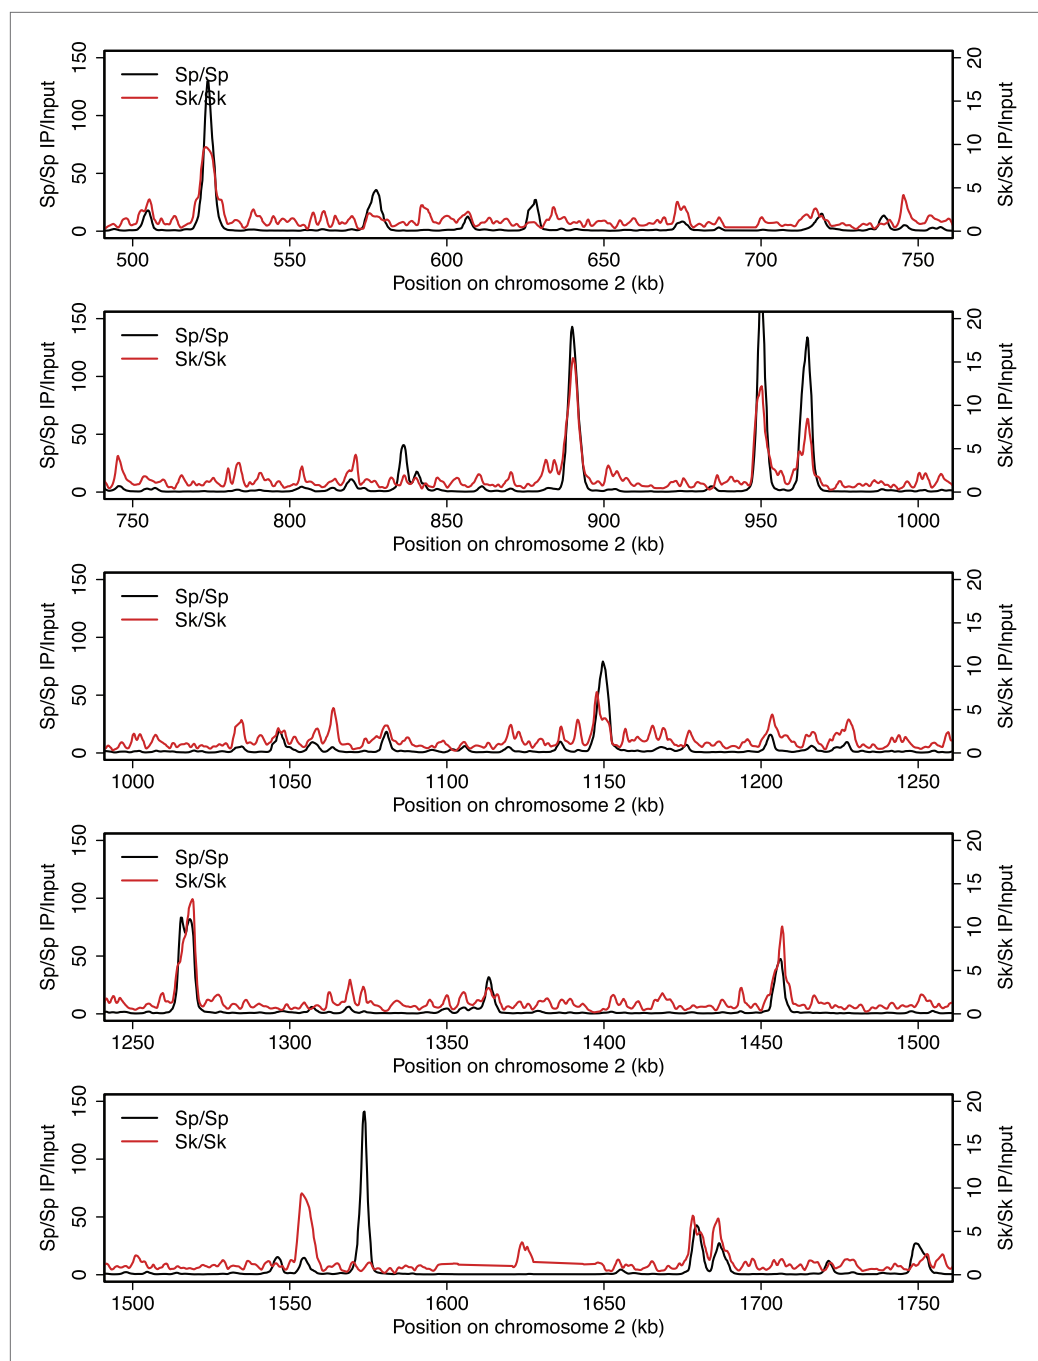

**Figure 2—figure supplement 6.** DSB hotspots in *Sk* and *Sp*.

DOI: [10.7554/eLife.02630.010](https://doi.org/10.7554/eLife.02630.010)

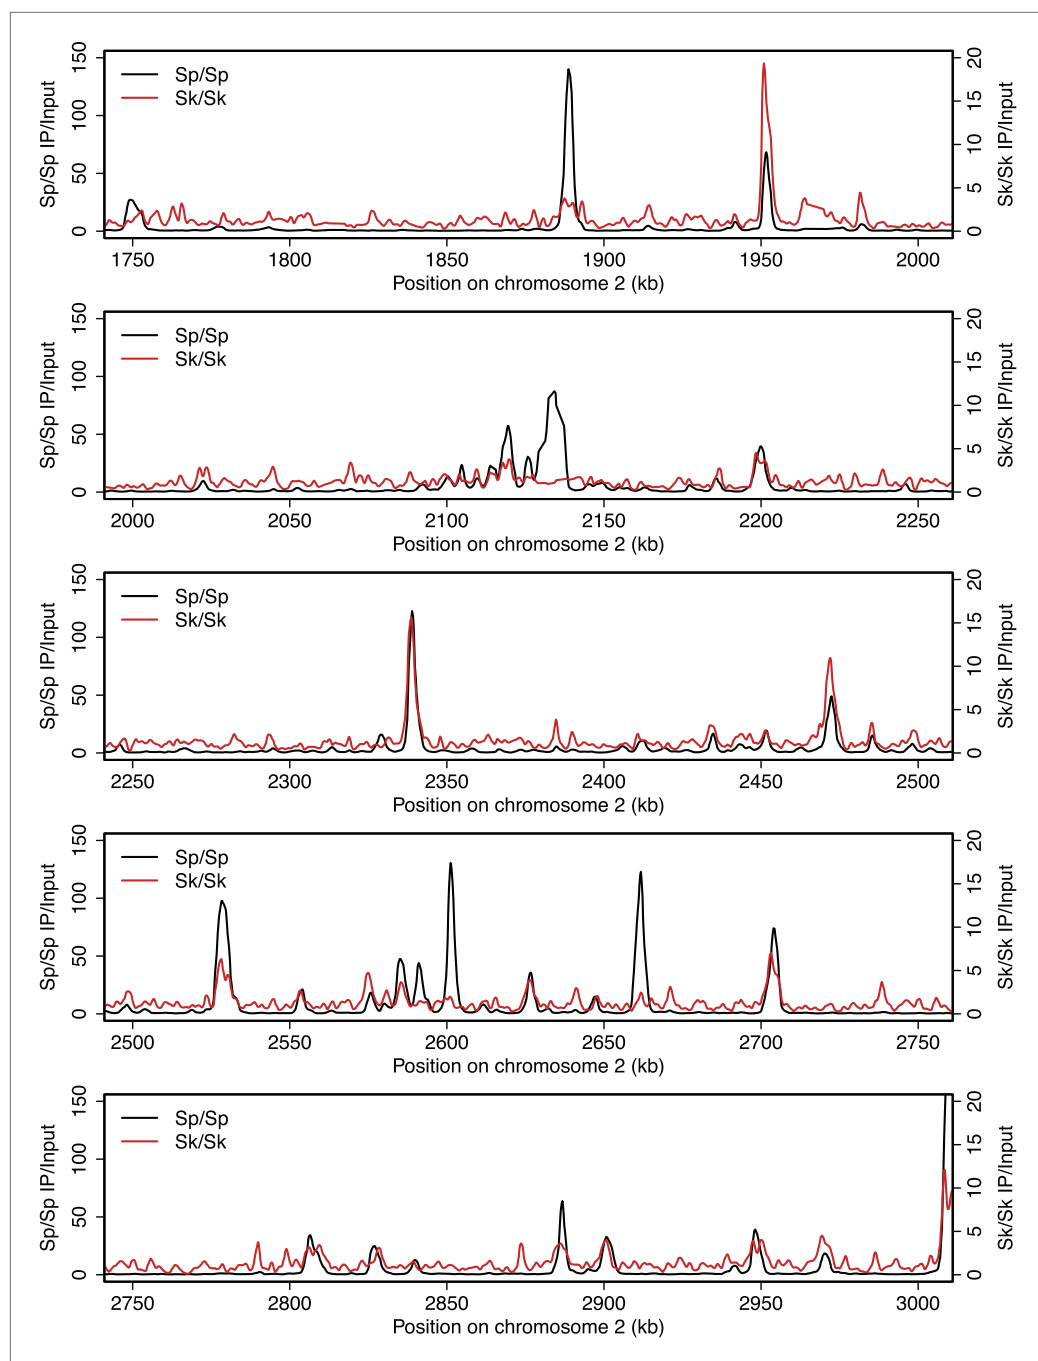

**Figure 2—figure supplement 7.** DSB hotspots in *Sk* and *Sp*.

DOI: [10.7554/eLife.02630.011](https://doi.org/10.7554/eLife.02630.011)

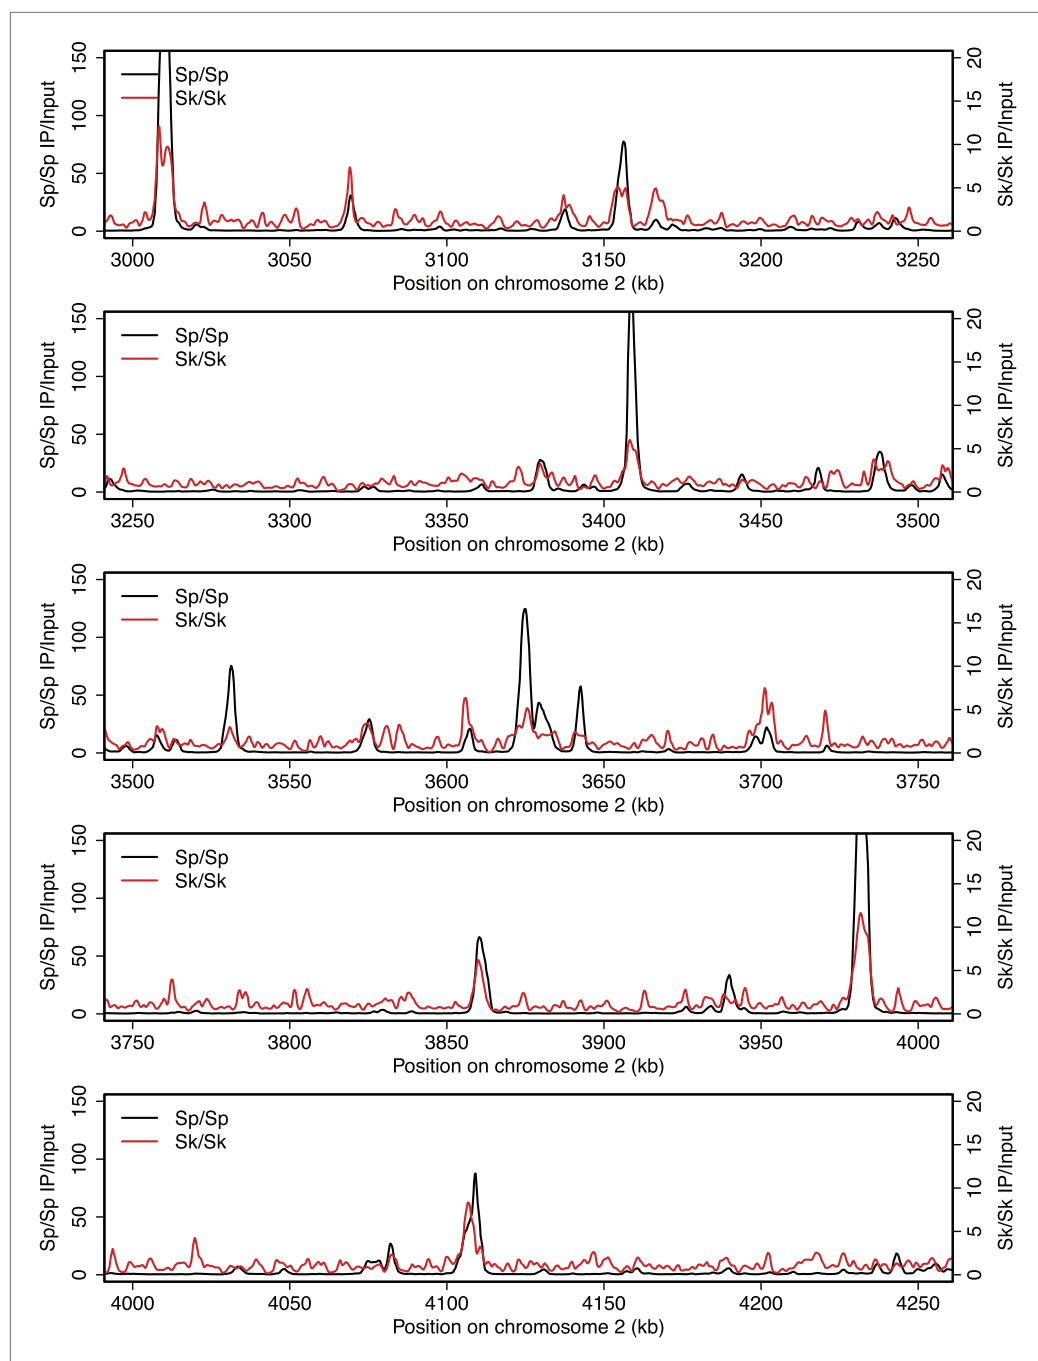

**Figure 2—figure supplement 8.** DSB hotspots in *Sk* and *Sp*.

DOI: [10.7554/eLife.02630.012](https://doi.org/10.7554/eLife.02630.012)

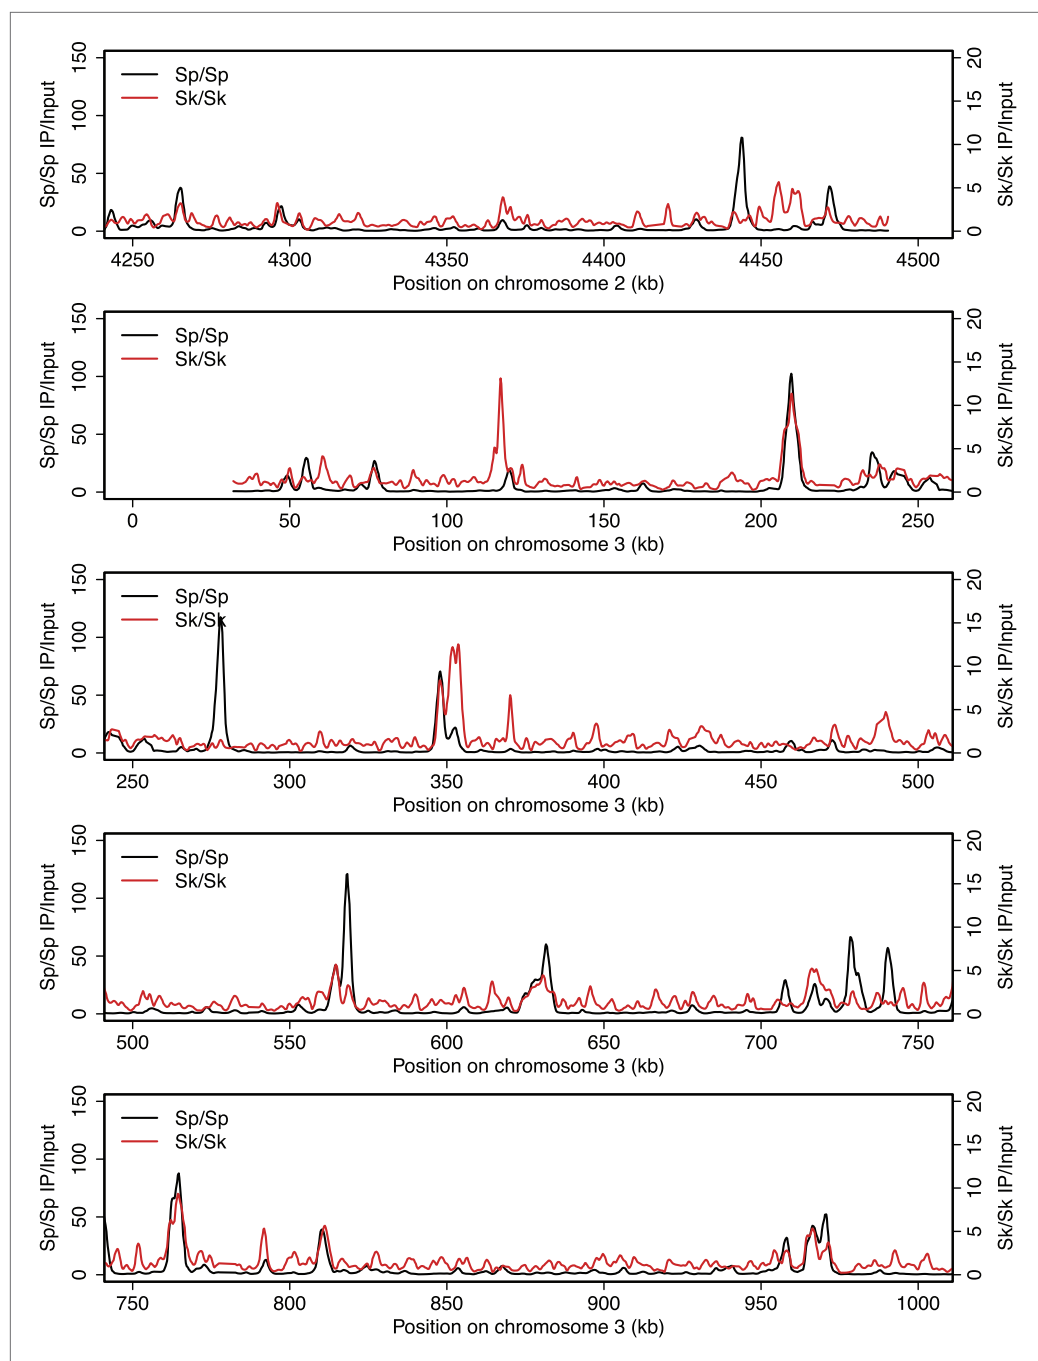

**Figure 2—figure supplement 9.** DSB hotspots in *Sk* and *Sp*.

DOI: [10.7554/eLife.02630.013](https://doi.org/10.7554/eLife.02630.013)

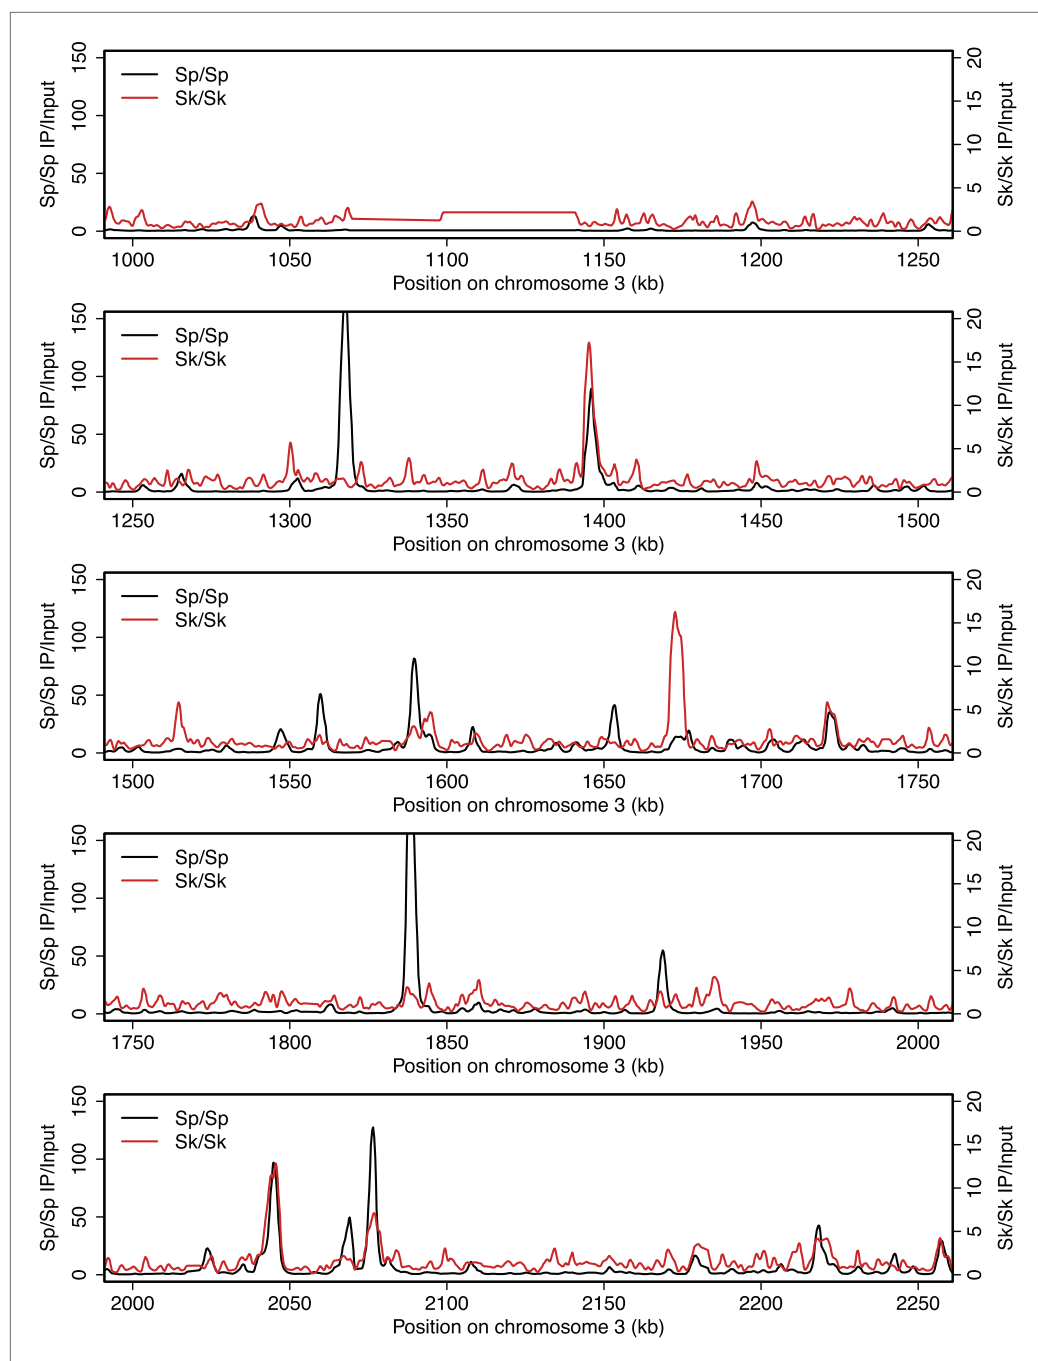

**Figure 2—figure supplement 10.** DSB hotspots in *Sk* and *Sp*.

DOI: [10.7554/eLife.02630.014](https://doi.org/10.7554/eLife.02630.014)

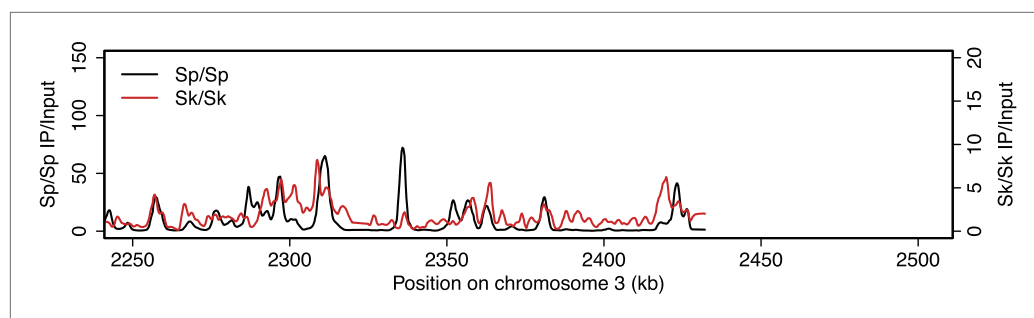

**Figure 2—figure supplement 11.** DSB hotspots in *Sk* and *Sp*.

DOI: [10.7554/eLife.02630.015](https://doi.org/10.7554/eLife.02630.015)

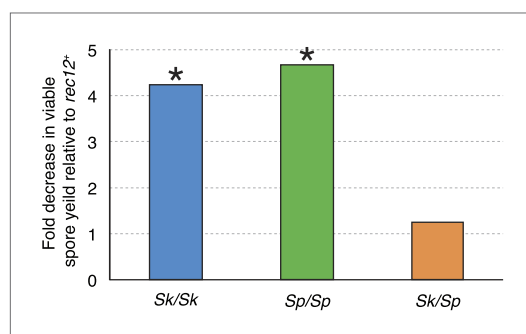

**Figure 3.** Recombination does not alter *Sk/Sp* hybrid fertility. The average *rec12*<sup>+</sup> viable spore yield of each diploid was divided by that of the corresponding *rec12Δ* mutant. For the pure species diploids, the viable spore yield was significantly lower in the absence of *Rec12* ( $n \geq 5$  experiments for each genotype; \*  $t$  test  $p < 0.05$ ). The viable spore yield of *Sk/Sp* hybrids, on the other hand, was not significantly different between *rec12*<sup>+</sup> and *rec12Δ* *Sk/Sp* hybrids ( $p = 0.42$ ). This indicates that recombination likely hurts fertility just as much as it promotes fertility in *Sk/Sp* hybrid meiosis. These data are shown in a different format in **Figure 5A**.

DOI: [10.7554/eLife.02630.016](https://doi.org/10.7554/eLife.02630.016)

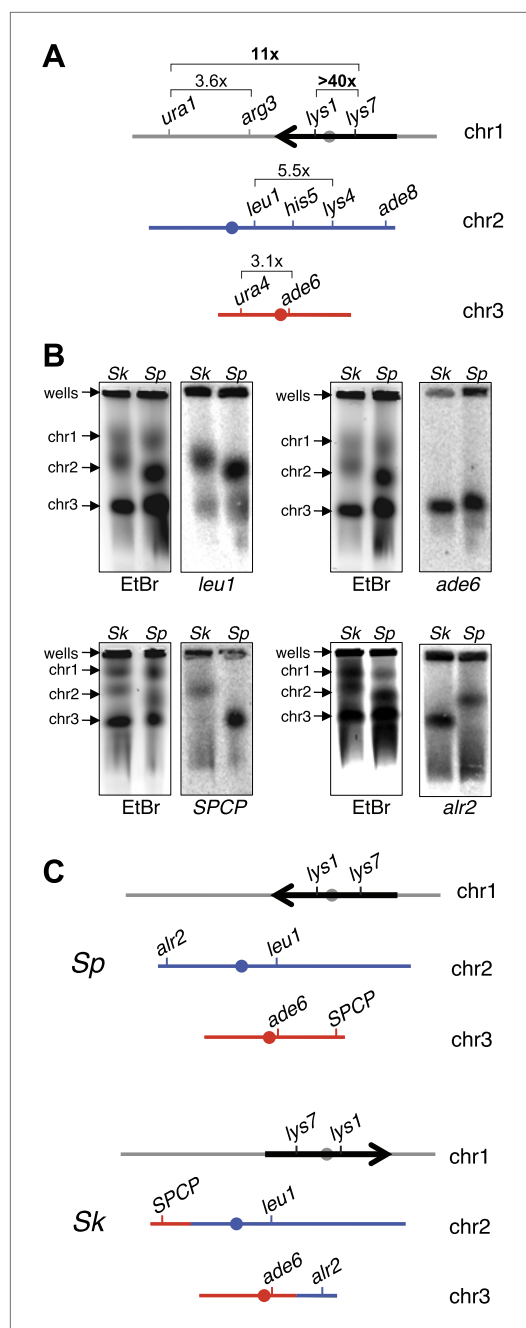

**Figure 4.** Chromosome rearrangements limit the recovery of recombinant progeny in *Sk/Sp* hybrids. **(A)** A cartoon illustrating the fold decrease in recombinant frequencies in *Sk/Sp* spores compared to that in *Sp/Sp* spores. The detailed recombination data are in **Figure 4—figure supplements 2 and 3**. The *Sp* karyotype is depicted with a grey/black chromosome 1, blue chromosome 2, and red chromosome 3. The backwards black arrow indicates an inversion in *Sp* relative to the ancestral karyotype. **(B)** Pulsed-field gels separating *Sp* and *Sk* chromosomes and Southern blots of the gels probed with DNA from the indicated loci revealed a reciprocal translocation that includes several Figure 4. Continued on next page

Figure 4. Continued

essential genes including *alr2* and *SPCP1E11.08* (abbreviated *SPCP*). The EtBr-stained gels are on the left and the Southern blots are on the right in each pair. (C) A cartoon summary of the karyotype differences between *Sp* and *Sk*. The arrow indicates the location of the inversion in *Sp*. A few landmark loci are shown.

DOI: 10.7554/eLife.02630.017

| Chromosome | Interval           | Recombinants | Total | <i>Sk/Sk</i> distance (cM) | <i>Sp/Sp</i> distance (cM) | Fold Change |
|------------|--------------------|--------------|-------|----------------------------|----------------------------|-------------|
| 2          | <i>lys4 – his4</i> | 3            | 129   | 2.3                        | 12                         | 5.2         |
| 2          | <i>his4 – ade8</i> | 42           | 132   | 50.6                       | 94                         | 1.9         |
| 3          | <i>ade6 – ura4</i> | 72           | 157   | unlinked                   | 190                        | NA          |

Figure 4—figure supplement 1. Recombination frequencies in *Sk*.

DOI: 10.7554/eLife.02630.018

| Chr     | Interval           | Recombinants | Total | <i>Sk/Sp</i> distance (cM) | <i>Sp/Sp</i> distance (cM) | Fold decrease |
|---------|--------------------|--------------|-------|----------------------------|----------------------------|---------------|
| 1       | <i>ura1 – arg3</i> | 95           | 257   | 67                         | 240                        | 3.6           |
| 1       | <i>ura1 – lys7</i> | 32           | 95    | 56                         | 600                        | 11            |
| 1       | <i>ura1 – lys1</i> | 53           | 257   | 54                         | 480                        | 8.9           |
| 1       | <i>arg3 – lys1</i> | 33           | 257   | 27                         | 230                        | 8.5           |
| 1       | <i>arg3 – lys7</i> | 52           | 212   | 34                         | 360                        | 11            |
| 1       | <i>lys1 – lys7</i> | 0            | 95    | 0                          | 120                        | >40           |
| 2       | <i>leu1 – his5</i> | 12           | 201   | 6.1                        | 46                         | 7.5           |
| 2       | <i>his5 – lys4</i> | 57           | 201   | 42                         | 200                        | 4.8           |
| 2       | <i>leu1 – lys4</i> | 59           | 201   | 44                         | 240                        | 5.5           |
| 2       | <i>lys4 – his4</i> | 17           | 307   | 5.9                        | 12                         | 2             |
| 2       | <i>his4 – ade8</i> | 43           | 307   | 16                         | 94                         | 5.9           |
| 2       | <i>lys4 – ade8</i> | 48           | 307   | 19                         | 100                        | 5.3           |
| 3       | <i>ade6 – ura4</i> | 51           | 144   | 62                         | 190                        | 3.1           |
| 2 and 3 | <i>leu1 – ade6</i> | 20           | 101   | 25                         | NA                         | NA            |

Figure 4—figure supplement 2. Recombination frequencies in *Sk/Sp* hybrids are low relative to *Sp*.

DOI: 10.7554/eLife.02630.019



| strains crossed | Chr. | Parental <i>Sp</i> |     | Parental <i>Sk</i> |     | Recombinant 1      |    | Recombinant 2      |    | Hybrid distance (cM) | <i>Sp</i> Distance (cM) |
|-----------------|------|--------------------|-----|--------------------|-----|--------------------|----|--------------------|----|----------------------|-------------------------|
|                 |      | Genotype           | #   | Genotype           | #   | Genotype           | #  | Genotype           | #  |                      |                         |
| SZY142x210      | 1    | <i>arg3- lys7-</i> | 51  | <i>arg3+ lys7+</i> | 109 | <i>arg3- lys7+</i> | 36 | <i>arg3+ lys7-</i> | 16 | 34                   | 360                     |
| SZY142x180      | 1    | <i>ura1- arg3-</i> | 64  | <i>ura1+ arg3+</i> | 98  | <i>ura1- arg3+</i> | 52 | <i>ura1+ arg3-</i> | 43 | 67                   | 240                     |
| SZY142x180*     | 1    | <i>ura1- lys7-</i> | 63  | <i>ura1+ lys7+</i> | 0   | <i>ura1- lys7+</i> | 0  | <i>ura1+ lys7-</i> | 32 | 56                   | 600                     |
| SZY142x180*     | 1    | <i>lys1+ lys7-</i> | 95  | <i>lys1- lys7+</i> | NA  | <i>lys1+ lys7+</i> | 0  | <i>lys1- lys7-</i> | NA | 0                    | 120                     |
| SZY142x180      | 1    | <i>ura1- lys1+</i> | 63  | <i>ura1+ lys1-</i> | 109 | <i>ura1- lys1-</i> | 53 | <i>ura1+ lys1+</i> | 32 | 54                   | 480                     |
| SZY142x180      | 1    | <i>arg3- lys1+</i> | 74  | <i>arg3+ lys1-</i> | 129 | <i>arg3- lys1-</i> | 33 | <i>arg3+ lys1+</i> | 21 | 27                   | 230                     |
| SZY128x71       | 2    | <i>leu1- his5-</i> | 12  | <i>leu1+ his5+</i> | 177 | <i>leu1- his5+</i> | 1  | <i>leu1+ his5-</i> | 11 | 6.1                  | 46                      |
| SZY128x71       | 2    | <i>his5- lys4+</i> | 15  | <i>his5+ lys4-</i> | 129 | <i>his5- lys4-</i> | 8  | <i>his5+ lys4+</i> | 49 | 42                   | 200                     |
| SZY128x71       | 2    | <i>leu1- lys4+</i> | 9   | <i>leu1+ lys4-</i> | 133 | <i>leu1- lys4-</i> | 4  | <i>leu1+ lys4+</i> | 55 | 44                   | 240                     |
| SZY127x94       | 2    | <i>lys4+ his4+</i> | 104 | <i>lys4- his4-</i> | 186 | <i>lys4+ his4-</i> | 8  | <i>lys4- his4+</i> | 9  | 5.9                  | 12                      |
| SZY127x94       | 2    | <i>his4+ ade8-</i> | 91  | <i>his4- ade8+</i> | 173 | <i>his4+ ade8+</i> | 22 | <i>his4- ade8-</i> | 21 | 16                   | 94                      |
| SZY127x94       | 2    | <i>lys4+ ade8-</i> | 88  | <i>lys4- ade8+</i> | 171 | <i>lys4+ ade8+</i> | 24 | <i>lys4- ade8-</i> | 24 | 19                   | 110                     |
| SZY297x480      | 3    | <i>ade6+ ura4+</i> | 22  | <i>ade6- ura4-</i> | 71  | <i>ade6+ ura4-</i> | 4  | <i>ade6- ura4+</i> | 47 | 62                   | 190                     |

**Figure 4—figure supplement 3.** *Sk* alleles are underrepresented in the progeny of *Sk/Sp* hybrids.

DOI: [10.7554/eLife.02630.020](https://doi.org/10.7554/eLife.02630.020)

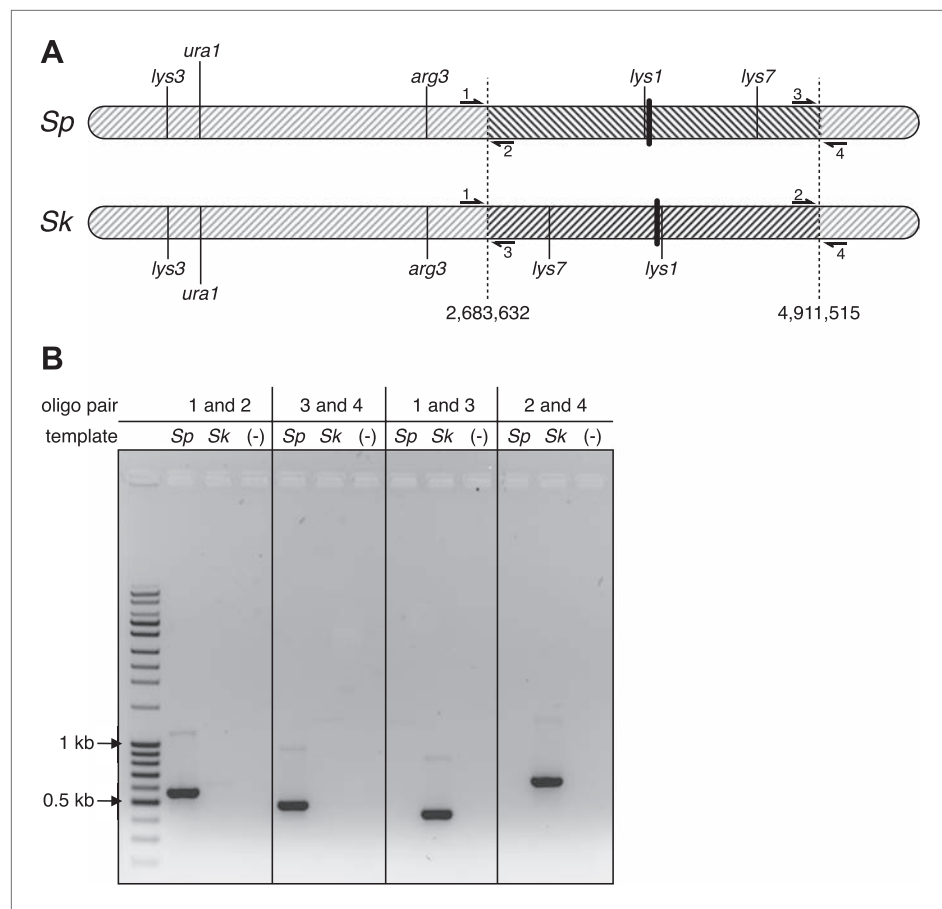

**Figure 4—figure supplement 4.** *Sp* has an inversion on chromosome 1 relative to *Sk*.

DOI: [10.7554/eLife.02630.021](https://doi.org/10.7554/eLife.02630.021)

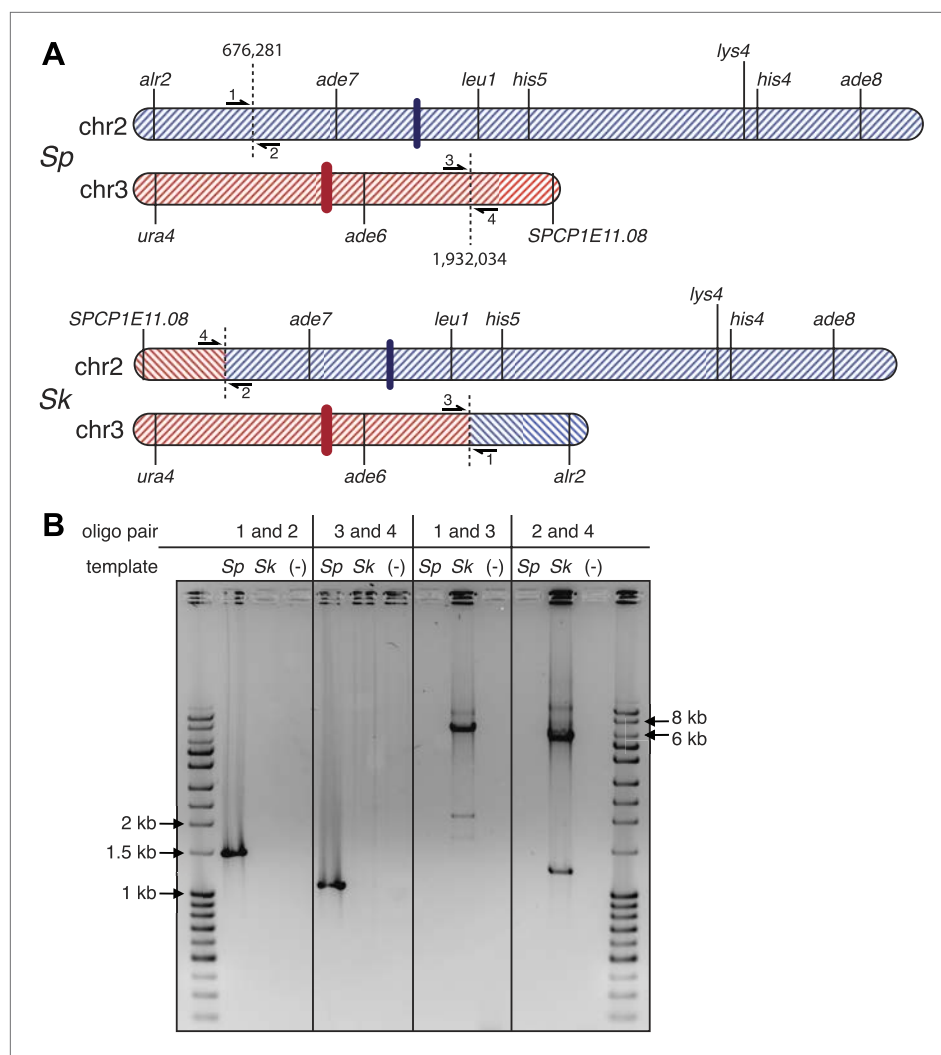

**Figure 4—figure supplement 5.** *Sk* has a reciprocal translocation between chromosomes 2 and 3.

DOI: [10.7554/eLife.02630.022](https://doi.org/10.7554/eLife.02630.022)

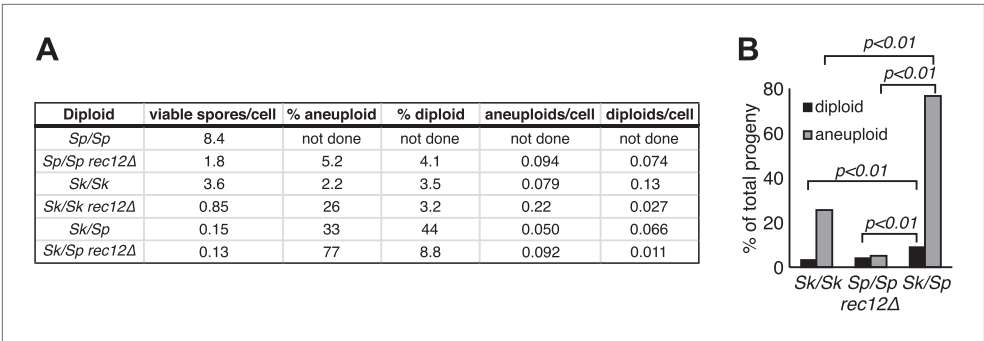

**Figure 5.** Increased aneuploidy amongst viable *Sk/Sp* gametes is recombination-independent. **(A)** We calculated both viable spore yield (viable spores/cell) as well as the fraction of viable spores that are aneuploid or diploid ('Materials and methods'). In the absence of *Rec12*, the relative frequencies of aneuploids and diploids are elevated in all cases. However, there is significantly more aneuploidy and diploidy of viable spores produced by *rec12Δ Sk/Sp* hybrids than by *rec12Δ* pure species controls. This shows the phenotype is not caused solely by recombination defects. In addition, *Sk/Sp* diploids do not generate more aneuploids or diploids relative to the number of cells induced to undergo meiosis compared to pure-species controls. Some of these data are presented in a different format in **Figures 1H** and **Figure 3**. **(B)** A bar graph illustrating the fraction of the viable spores produced by the indicated *rec12Δ* diploids that are aneuploid or diploid (G-test,  $n > 300$  for each). DOI: [10.7554/eLife.02630.023](https://doi.org/10.7554/eLife.02630.023)

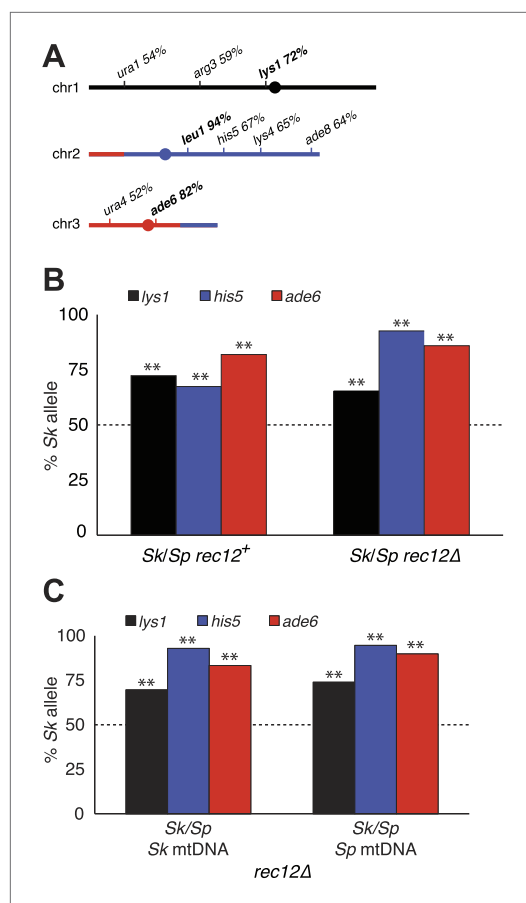

**Figure 6.** Alleles on all three *Sk* chromosomes show drive (independent of mitochondrial DNA type). **(A)** *Sk* alleles were inherited by significantly more than 50% of the viable spores produced by *Sk/Sp* hybrids, except *ura1* and *ura4* (G-test  $p < 0.01$ ;  $n > 100$  for each). The markers nearest to the meiotic drive loci (i.e., those showing the greatest bias towards *Sk* inheritance) are shown in boldface. The color scheme is the same as that in **Figure 4**. The data underlying these numbers are shown in **Figure 4—figure supplement 3**, and **Figure 6—figure supplement 1**. **(B)** The *Sk* alleles of *lys1*, *his5* and *ade6* show significant drive both in the presence and absence of recombination (\*\* $p < 0.01$ ,  $n > 300$  for *lys1* and *his5*,  $n > 80$  for *ade6*). The amount of *his5* drive is greater in the absence to *Rec12* due to enhanced linkage with the driving locus. The data underlying this graph are shown in **Figure 6—figure supplement 1**. **(C)** Incompatibilities between the *Sk* mitochondrial DNA and *Sp* nuclear genes are not responsible for the drive phenotype because we observed the same drive in *rec12Δ* *Sk/Sp* hybrids with either *Sk* or *Sp*-derived mitochondrial DNA (\*\* $p < 0.01$ ,  $n > 200$  for *lys1* and *his5*,  $n > 50$  for *ade6*). The data underlying this graph are shown in **Figure 6—figure supplement 4**.

DOI: 10.7554/eLife.02630.024

| locus           | <i>Sp/Sp rec12*</i> (n=328) |      | <i>Sp/Sp rec12Δ</i> (n=368) |      | <i>Sk/Sk rec12*</i> (n=227) |      | <i>Sk/Sk rec12Δ</i> (n=342) |      | <i>Sk/Sp rec12*</i> (n=621) |      | <i>Sk/Sp rec12Δ</i> (n=589) |      |
|-----------------|-----------------------------|------|-----------------------------|------|-----------------------------|------|-----------------------------|------|-----------------------------|------|-----------------------------|------|
|                 | observed                    | %    | observed                    | %    | observed                    | %    | observed                    | %    | observed                    | %    | observed                    | %    |
| <i>his5*</i>    | 149                         | 45.4 | 174                         | 49.9 | 113                         | 51.6 | 158                         | 47.7 | 236                         | 67.4 | 40                          | 7.4  |
| <i>his5</i>     | 179                         | 54.6 | 175                         | 51.1 | 106                         | 48.4 | 173                         | 52.3 | 114                         | 32.6 | 497                         | 92.6 |
| <i>lys1*</i>    | 159                         | 48.5 | 168                         | 48.1 | 111                         | 50.7 | 173                         | 52.3 | 97                          | 27.7 | 350                         | 65.2 |
| <i>lys1</i>     | 169                         | 51.5 | 181                         | 51.9 | 108                         | 49.3 | 158                         | 47.7 | 253                         | 72.3 | 187                         | 34.8 |
| <i>ade6*</i>    | 178                         | 54.3 | 153                         | 46.4 | 94                          | 43.9 | 129                         | 53.1 | 26                          | 18.1 | 12                          | 14.1 |
| <i>ade6</i>     | 150                         | 45.7 | 177                         | 53.6 | 120                         | 56.1 | 114                         | 46.9 | 118                         | 81.9 | 73                          | 85.9 |
|                 |                             |      |                             |      |                             |      |                             |      |                             |      |                             |      |
| diploid         |                             | ND   | 19                          | 5.2  | 8                           | 3.5  | 11                          | 3.2  | 271                         | 43.6 | 52                          | 8.8  |
| aneuploid       |                             | ND   | 19                          | 5.2  | 5                           | 2.2  | 88                          | 25.7 | 204                         | 32.9 | 452                         | 76.7 |
| VS <sub>Y</sub> | 8.4                         |      | 1.8                         |      | 3.6                         |      | 0.85                        |      | 0.15                        |      | 0.13                        |      |

**Figure 6—figure supplement 1.** Summary of *Sk/Sp* hybrid and pure species diploid meiotic phenotypes and distribution of alleles in their progeny.  
DOI: 10.7554/eLife.02630.025

| locus        | aneuploids                  |                             | haploids                    |                             |
|--------------|-----------------------------|-----------------------------|-----------------------------|-----------------------------|
|              | <i>Sk/Sp rec12*</i> (n=204) | <i>Sk/Sp rec12*</i> (n=146) | <i>Sk/Sp rec12*</i> (n=146) | <i>Sk/Sp rec12*</i> (n=146) |
|              | observed                    | %                           | observed                    | %                           |
| <i>his5*</i> | 134                         | 65.7                        | 102                         | 69.9                        |
| <i>his5</i>  | 70                          | 34.3                        | 44                          | 30.1                        |
| <i>lys1*</i> | 59                          | 28.9                        | 38                          | 26.0                        |
| <i>lys1</i>  | 145                         | 71.1                        | 108                         | 74.0                        |

**Figure 6—figure supplement 2.** Biased transmission favoring *Sk* alleles on chromosomes 1 and 2 is observed in aneuploid and haploid spores.  
DOI: 10.7554/eLife.02630.026

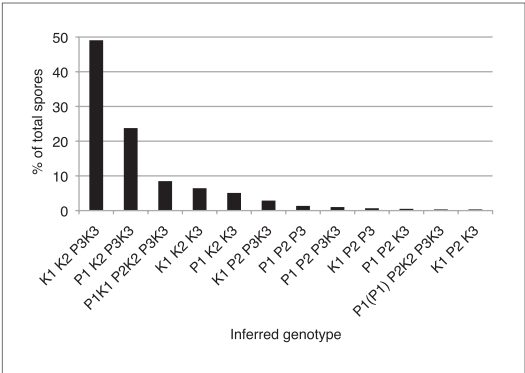

**Figure 6—figure supplement 3.** Distribution of progeny from *rec12Δ Sk/Sp* hybrid meiosis.  
DOI: 10.7554/eLife.02630.027

| locus                    | <i>Sk/Sp rec12Δ</i> (n=339) |      | <i>Sk/Sp rec12Δ</i> (n=341) |      |
|--------------------------|-----------------------------|------|-----------------------------|------|
|                          | <i>Sk</i> mtDNA             |      | <i>Sp</i> mtDNA             |      |
|                          | observed                    | %    | observed                    | %    |
| <i>his5</i> <sup>+</sup> | 21                          | 7.1  | 16                          | 5.4  |
| <i>his5</i> <sup>-</sup> | 275                         | 92.9 | 283                         | 94.6 |
| <i>lys1</i> <sup>+</sup> | 206                         | 69.6 | 221                         | 73.9 |
| <i>lys1</i> <sup>-</sup> | 90                          | 30.4 | 78                          | 26.1 |
| <i>ade6</i> <sup>+</sup> | 9                           | 16.7 | 6                           | 10.2 |
| <i>ade6</i> <sup>-</sup> | 45                          | 83.3 | 53                          | 89.8 |

**Figure 6—figure supplement 4.** Meiotic drive in *Sk/Sp* hybrids is independent of mitochondrial DNA.  
DOI: [10.7554/eLife.02630.028](https://doi.org/10.7554/eLife.02630.028)

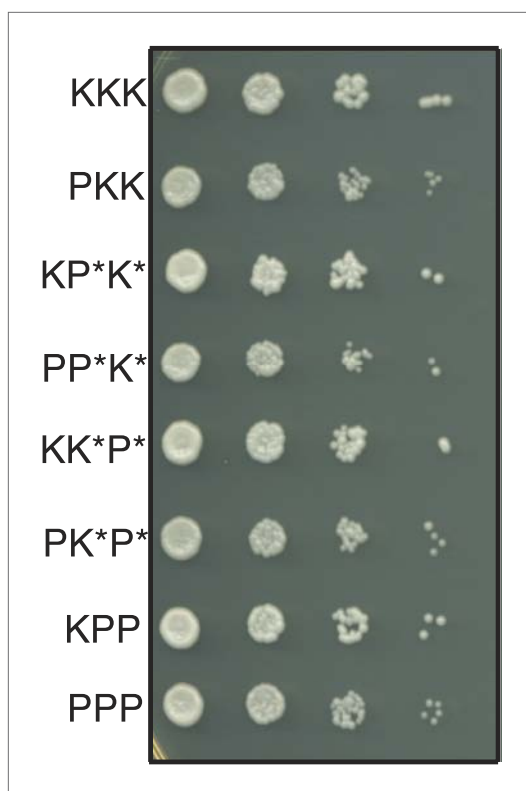

**Figure 7.** The haploid progeny of *Sk/Sp* hybrids have similar growth rates. The progeny of *rec12Δ Sk/Sp* hybrids with the indicated chromosomes were diluted and grown on rich YEA medium. KKK indicates the *Sk* parental genotype, whereas PPP indicates the *Sp* parental genotype. The strains were genotyped using *lys1*, *his5* and *ade6* alleles on chromosomes 1, 2, and 3, respectively. Strains that inherit intact chromosomes 2 and 3 from different species are non-viable because they lack many essential genes. However, we do rarely recover viable recombinant strains that have alleles from *Sk* chromosome 2 and *Sp* chromosome 3 (and vice versa). Potentially recombinant chromosomes are denoted with an \*. All haploid strains recovered have growth rates similar to that of the parental species, suggesting mitotic growth defects do not underlie differential recovery of the genotypes.

DOI: [10.7554/eLife.02630.029](https://doi.org/10.7554/eLife.02630.029)



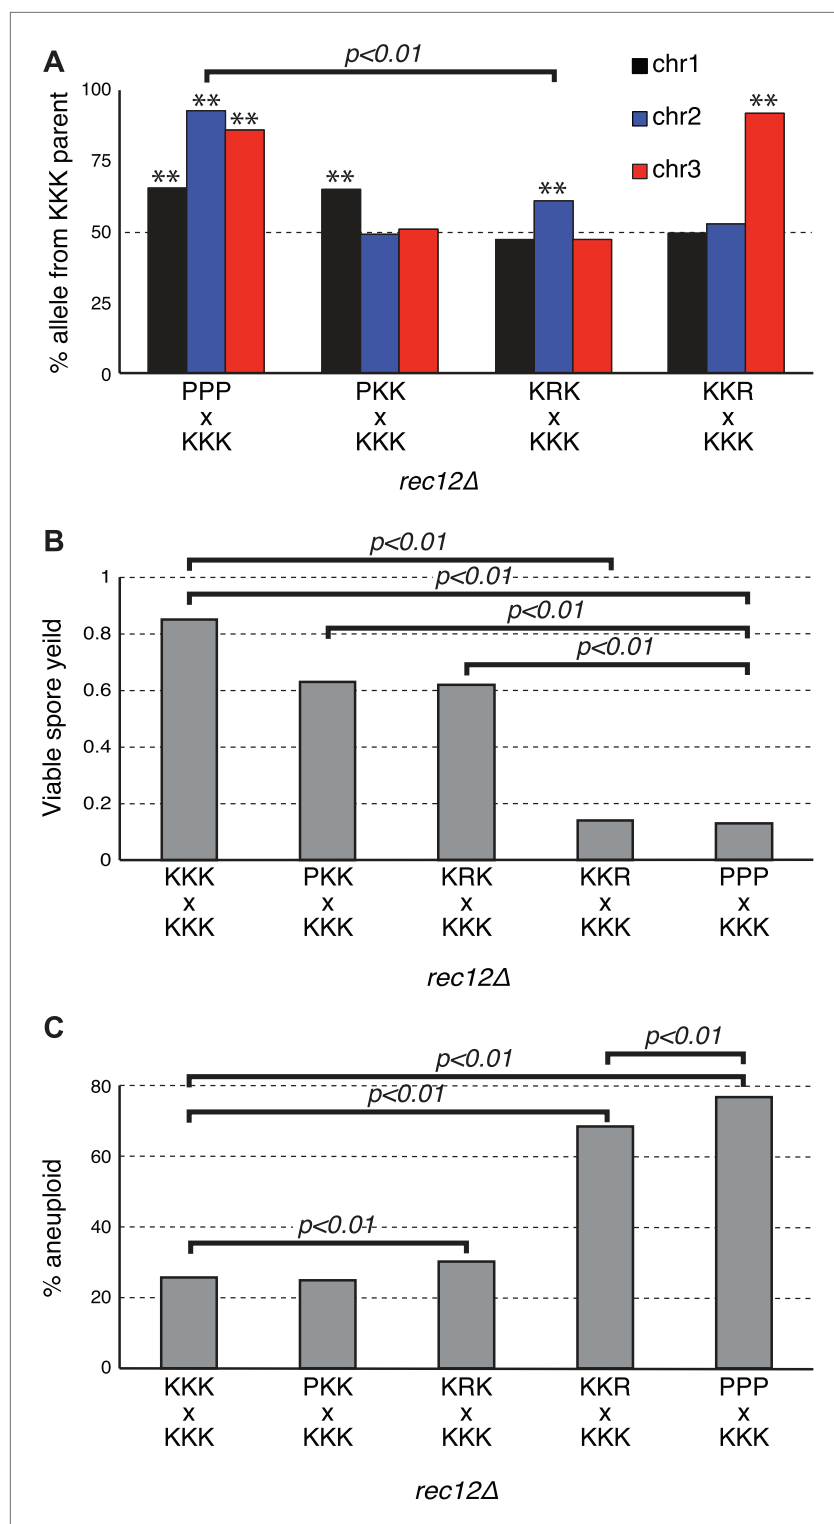

**Figure 8.** Sk drive alleles are autonomous and contribute to hybrid infertility. Aneuploidy is largely caused by heterozygosity of Sk and Sp DNA on chromosome 3. **(A)** Comparison of meiotic drive phenotypes between *rec12Δ* diploids generated by mating Sk to Sp or to haploid strains obtained from Sk/Sp hybrids. 'R' indicates a recombinant chromosome (**Figure 8—figure supplement 1**), which is compatible with all Sk chromosomes but does not contain a meiotic drive allele. All Sk chromosomes can drive autonomously (\*\* indicates drive; G-test  $p < 0.01$ ). However, the drive of Sk chr2 is lower in the KRK/KKK diploid than in pure PPP/KKK hybrids (G-test;  $n > 500$  for chromosomes 1 and 2,  $n > 80$  for chromosome 3 in each cross). The PPP/KKK data are also shown in **Figure 6B**. *Figure 8. Continued on next page*

Figure 8. Continued

(B) Fertility defects of hybrids parallel the amount of drive observed amongst the viable spores (see A, p-values obtained from t-tests, averages of at least five experiments are shown). This is consistent with drive causing spore death. (C) The high aneuploidy amongst the viable progeny of *Sk*/*Sp* hybrids is largely due to heterozygosity of one or more loci on chromosome 3 (G-test,  $n > 500$  for each cross). The PPP/KKK and KKK/KKK viable spore yield and aneuploid data are also shown in **Figure 5**. The data underlying these graphs are summarized in **Figure 8—figure supplement 2**.  
DOI: 10.7554/eLife.02630.030

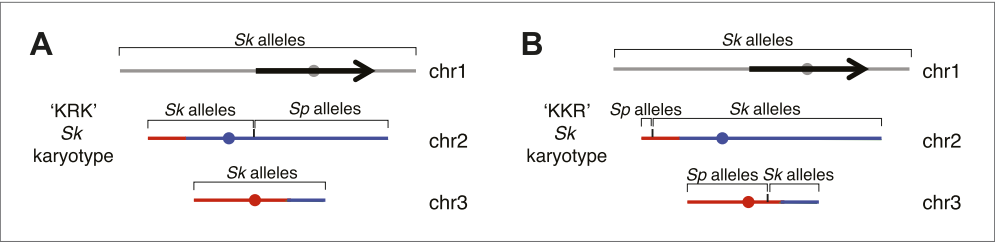

**Figure 8—figure supplement 1.** Genotype of recombinant strains used in **Figure 8**.  
DOI: 10.7554/eLife.02630.031

| locus                    | PPP x KKK<br><i>rec12Δ</i> n=589 |      | PKK x KKK<br><i>rec12Δ</i> n=684 |      | KRK x KKK<br><i>rec12Δ</i> n=708 |      | KKR x KKK<br><i>rec12Δ</i> n=801 |      |
|--------------------------|----------------------------------|------|----------------------------------|------|----------------------------------|------|----------------------------------|------|
|                          | observed                         | %    | observed                         | %    | observed                         | %    | observed                         | %    |
| <i>lys1</i> <sup>+</sup> | 350                              | 65.2 | 411                              | 65.1 | 364                              | 52.7 | 384                              | 50.5 |
| <i>lys1</i> <sup>-</sup> | 187                              | 34.8 | 220                              | 34.9 | 326                              | 47.3 | 377                              | 49.5 |
| <i>his5</i> <sup>+</sup> | 40                               | 7.4  | 321                              | 50.9 | 270                              | 39.2 | 400                              | 52.6 |
| <i>his5</i> <sup>-</sup> | 497                              | 92.6 | 310                              | 49.1 | 420                              | 60.8 | 361                              | 47.4 |
| <i>ade6</i> <sup>+</sup> | 12                               | 14.1 | 226                              | 49.0 | 224                              | 47.4 | 19                               | 8.9  |
| <i>ade6</i> <sup>-</sup> | 73                               | 85.9 | 235                              | 51.0 | 252                              | 52.6 | 194                              | 91.1 |
| diploid                  | 52                               | 8.8  | 26                               | 3.8  | 12                               | 1.7  | 33                               | 4.1  |
| aneuploid                | 452                              | 76.7 | 170                              | 24.9 | 214                              | 30.2 | 548                              | 68.4 |
| VS <sub>Y</sub>          | 0.13                             |      | 0.63                             |      | 0.62                             |      | 0.14                             |      |

**Figure 8—figure supplement 2.** Summary of meiotic phenotypes for *Sk*/*Sp* hybrids and diploids with one heterozygous chromosome and the distribution of alleles in their viable progeny.  
DOI: 10.7554/eLife.02630.032
